# Supplementary material for: Credibility assessment of endophytic PGPB on iron and zinc biofortification, soil health, and yield in three different varieties of soybean
Source: Research Square preprint supplement (doi:10.21203/rs.3.rs-8850695/v1), 2026-02-20
Supplement: Supplementary file 1 [file 1b6dc548dadf16039b6c8f4d.docx]

Supplementary Paper

**
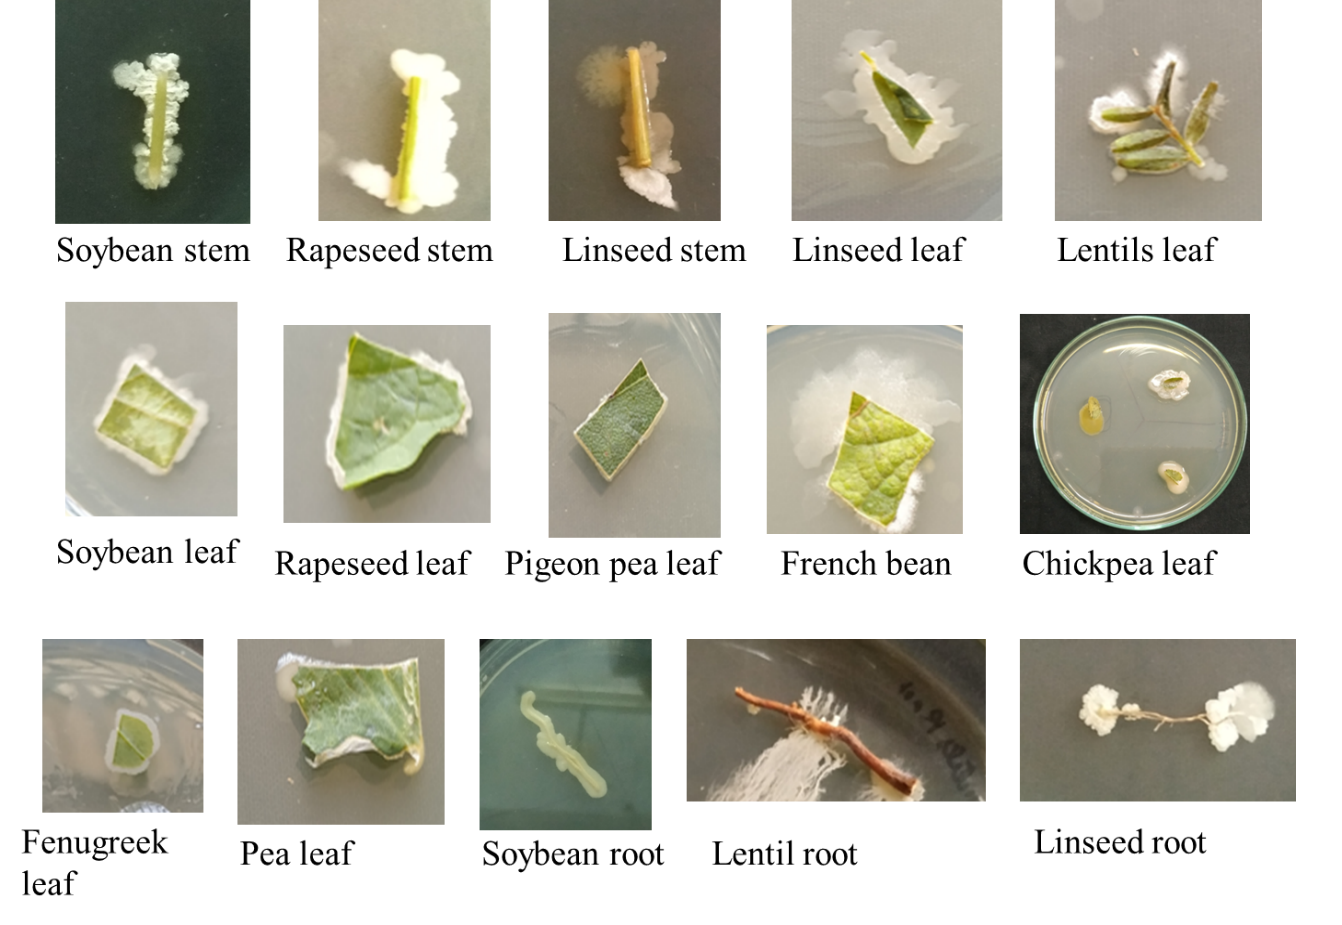
**

**Figure S1: Isolation of endophytic bacteria from diverse oil seed and legume crops**

**Table S1: Effect of different concentrations of PEG 6000 on the growth of endophytic bacterial isolates**

| **S.No.** | **Bacterial isolates** | **2%** | **6%** | **8%** | **10%** |
| --- | --- | --- | --- | --- | --- |
| 1 | PLSD6 | + | + | + | + |
| 2 | PLSD1 | + | + | + | + |

**Table S2: Determination of chemical nature of endophytic bacterial siderophore**

| **S.No.** | **Bacterial isolates** | **Hydroxamate** | **Catecholate** | **Carboxylate** |
| --- | --- | --- | --- | --- |
| 1 | PLSD6 | + | - | - |
| 2 | PLSD1 | + | - | + |

**Table S3: Morphological and Gram staining characters of selected bacterial isolates**

| **SN** | **Bacterial Isolates** | **Gram reaction** | **Shape** | **Edge** | **Elevation** | **Surface** | **Chromogenesis** | **Endospore** |
| --- | --- | --- | --- | --- | --- | --- | --- | --- |
| 1 | PLSD1 | Gram negative | Circular | Even | Convex | Glistening | white | - |
| 2 | PLSD6 | Gram negative | Circular | Even | Convex | Glistening | Yellowish and translucent | - |

**Table S4: Biochemical characteristics of selected bacterial isolates**

| **S.No** | **Bacterial sample** | **Starch hydrolysis** | **Urease**  **Production** | **Catalase Production** | **Gelatinase Production** | **Casein Hydrolysis** | **Cellulase Activity** | **Lipolytic Activity** | **Citrate Utilization** | **Indole** | **Methyl red** | **Voges**  **proskauers** |
| --- | --- | --- | --- | --- | --- | --- | --- | --- | --- | --- | --- | --- |
| **1.** | PLSD1 | **-** | **+** | **+** | **+** | **+** | **-** | **+** | **+** | **-** | **-** | **-** |
| **2.** | PLSD6 | **-** | **-** | **-** | **+** | **-** | **-** | **+** | **+** | **+** | **+** | **-** |

+ Sign represents presence of activity whereas – sign represents absence of activity

**Table S5: Carbohydrate source utilization of selected endophytic bacterial isolates**

| **S.No** | **Carbon source** | **Bacterial isolate** | |
| --- | --- | --- | --- |
| **PLSD6** | **PLSD1** |
| **1** | **Lactose** | Positive | Negative |
| **2** | **Xylose** | Positive | Positive |
| **3** | **Maltose** | Positive | Negative |
| **4** | **Fructose** | Positive | Positive |
| **5** | **Dextrose** | Positive | Positive |
| **6** | **Galactose** | Positive | Positive |
| **7** | **Raffinose** | Positive | Negative |
| **8** | **Trehalose** | Positive | Negative |
| **9** | **Melibiose** | Positive | Positive |
| **10** | **Sucrose** | Positive | Negative |
| **11** | **L-arabinose** | Positive | Positive |
| **12** | **Mannose** | Positive | Negative |
| **13** | **Inulin** | Positive | Negative |
| **14** | **Sodium gluconate** | Negative | Negative |
| **15** | **Glycerol** | Positive | Positive |
| **16** | **Salicin** | Positive | Negative |
| **17** | **Dulcitol** | Negative | Negative |
| **18** | **Inositol** | Positive | Negative |
| **19** | **Sorbitol** | Negative | Negative |
| **20** | **Mannitol** | Positive | Positive |
| **21** | **Adonitol** | Negative | Negative |
| **22** | **Arabitol** | Positive | Positive |
| **23** | **Erythritol** | Negative | Negative |
| **24** | **α-methyl-D- glucoside** | Positive | Negative |
| **25** | **Rhamnose** | Positive | Negative |
| **26** | **Cellobiose** | Positive | Negative |
| **27** | **Melizitose** | Negative | Negative |
| **28** | **α-methyl-D- mannoside** | Negative | Negative |
| **29** | **Xylitol** | Negative | Negative |
| **30** | **ONPG** | Negative | Negative |
| **31** | **Esculin** | Negative | Negative |
| **32** | **D-arabinose** | Negative | Negative |
| **33** | **Citrate** | Positive | Positive |
| **34** | **Malonate** | Negative | Negative |
| **35** | **Sorbose** | Negative | Negative |

**Table S6: Antibiotic sensitivity test of selected endophytic bacterial isolates**

| **S.N.** | **Antibiotic (µg/disc)** | **Bacterial isolates** | |
| --- | --- | --- | --- |
| **PLSD6** | **PLSD1** |
| **1** | **Cephalothin (CEP, 30 µg/disc)** | **+** | **-** |
| **2** | **Clindamycin (CD, 2 µg/disc)** | **+** | **-** |
| **3** | **Co-Trimoxazole (CO, 25 µg/disc)** | **+** | **-** |
| **4** | **Erythromycin (E, 15 µg/disc)** | **+** | **+** |
| **5** | **Gentamicin (GEN, 10 µg/disc)** | **+** | **+** |
| **6** | **Ofloxacin (OF, 1 µg/disc)** | **+** | **+** |
| **7** | **Penicillin-G (P, 10 µg/disc)** | **+** | **-** |
| **8** | **Vancomycin (VA, 30 µg/disc)** | **-** | **-** |
| **9** | **Chloramphenicol (C, 30 µg/disc)** | **+** | **+** |
| **10** | **Ampicillin (A, 30 µg/disc** | **-** | **+** |
| **11** | **Tetracycline (T, 15 µg/disc** | **+** | **+** |
| **12** | **Kanamycin (K, 30 µg/disc** | **+** | **+** |
| **13** | **Amikacin (AK, 15 µg/disc** | **+** | **+** |
| **14** | **Streptomycin (S, 15 µg/disc** | **+** | **+** |
| **15** | **Polymixin B (PB, 10 µg/disc)** | **-** | **+** |
| **16** | **Cefuroxime (CXM, 15 µg/disc)** | **-** | **+** |
| **18** | **Cloxacillin (COX, 10 µg/disc)** | **+** | **-** |

+ Sign represents presence of sensitivity against antibiotic, whereas – sign represents resistance
